# Supplementary material for: Spatial Variations of Soil N2 and N2O Emissions from a Temperate Forest: Quantified by the In Situ 15N Labeling Method
Source: MDPI journal article supplement (doi:10.3390/f13091347), 2022-08-24
Supplement: s1 [file s1]

**Supplementary Information**

**Spatial Variations of Soil N<sub>2</sub> and N<sub>2</sub>O Emissions  
from a Temperate Forest: Quantified by the *In Situ*  
<sup>15</sup>N Labeling Method**

**Dan Xi <sup>1,2</sup>, Yunting Fang <sup>3,4\*</sup> and Weixing Zhu <sup>5</sup>**

<sup>1</sup> Lushan Botanical Garden, Chinese Academy of Sciences, Jiujiang 332900, China

<sup>2</sup> College of Forestry, Fujian Agriculture and Forestry University, Fuzhou 350002, China

<sup>3</sup> CAS Key Laboratory of Forest Ecology and Management, Institute of Applied Ecology, Chinese Academy of Sciences, Shenyang 110016, China

<sup>4</sup> Key Laboratory of Stable Isotope Techniques and Applications, Shenyang, 110016, China

<sup>5</sup> Department of Biological Sciences, Binghamton University, The State University of New York, Binghamton, NY 13902, USA

\* Correspondence: fangyt@iae.ac.cn; Tel.: +86-24-83970541

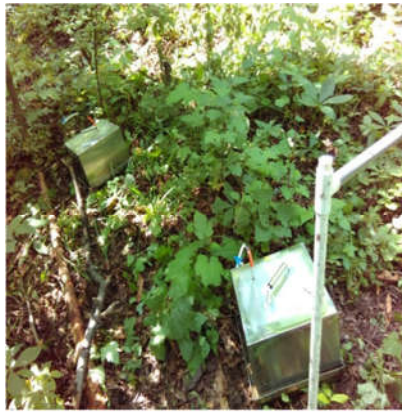

**Upper slope**

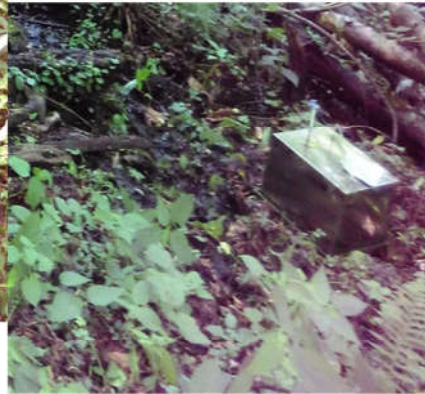

**Middle slope**

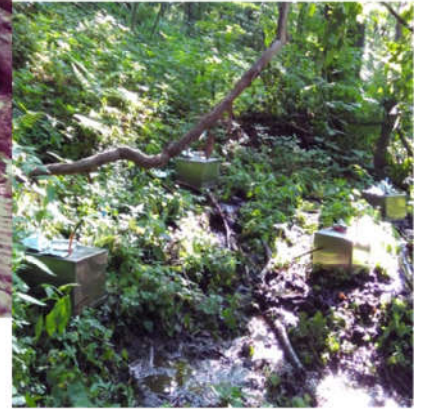

**Lower slope**

**Figure S1.** The sampling photos at the three slope positions (site 1) in the mixed forest of Qingyuan station in Northeast China.

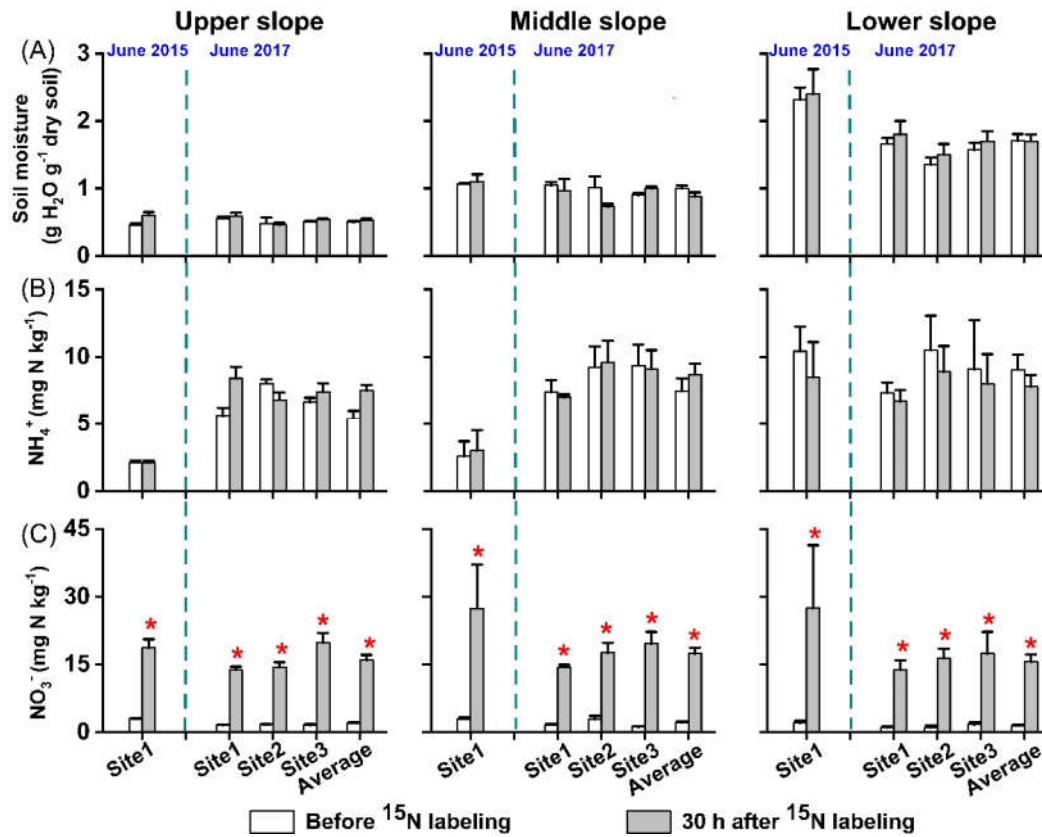

**Figure S2.** Changes of 0–20 cm soil moisture (A, express as gravity water content), ammonium (NH<sub>4</sub><sup>+</sup>, B), and nitrate (NO<sub>3</sub><sup>-</sup>, C) contents before and after <sup>15</sup>N labeling at different slope positions in the mixed forest of Qingyuan station in Northeast China. Differences were analyzed by T paired-sample test ( $p < 0.05$ ).

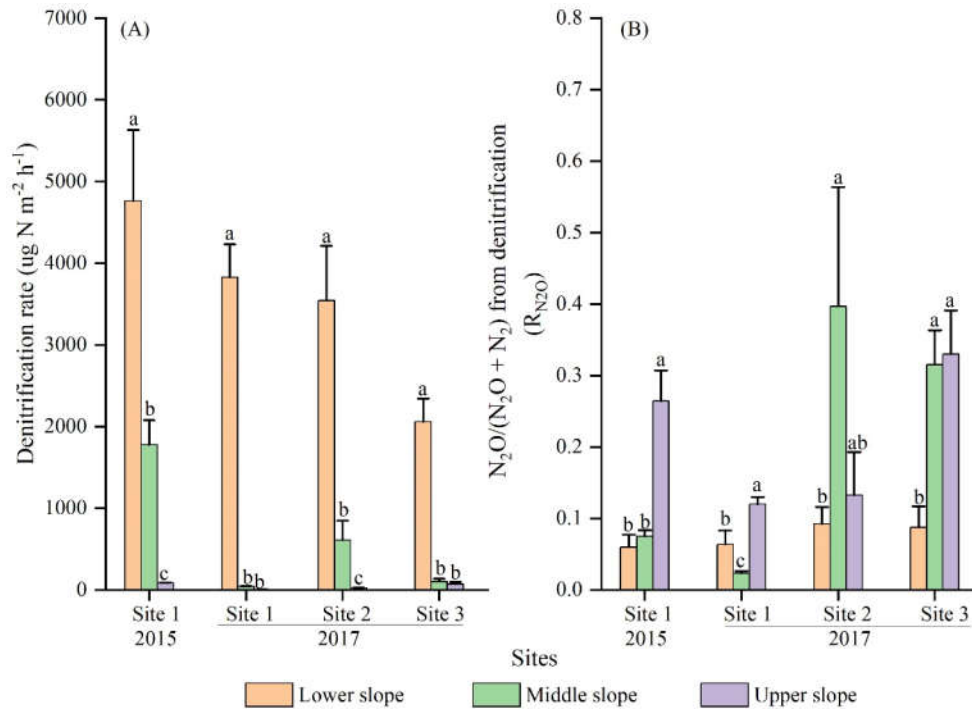

**Figure S3.** The rates (A) and  $N_2O/(N_2O + N_2)$  ratios (B) from denitrification over a 30 h incubation after *in situ*  $^{15}NO_3^-$  addition ( $2.5 \text{ g } ^{15}N \text{ m}^{-2}$ ) at different slope positions in the mixed forest of Qingyuan station in Northeast China. Values from different sites (1, 2, 3) and overall average were shown. Different lowercase letters indicate significant differences among slopes ( $p < 0.05$ ).

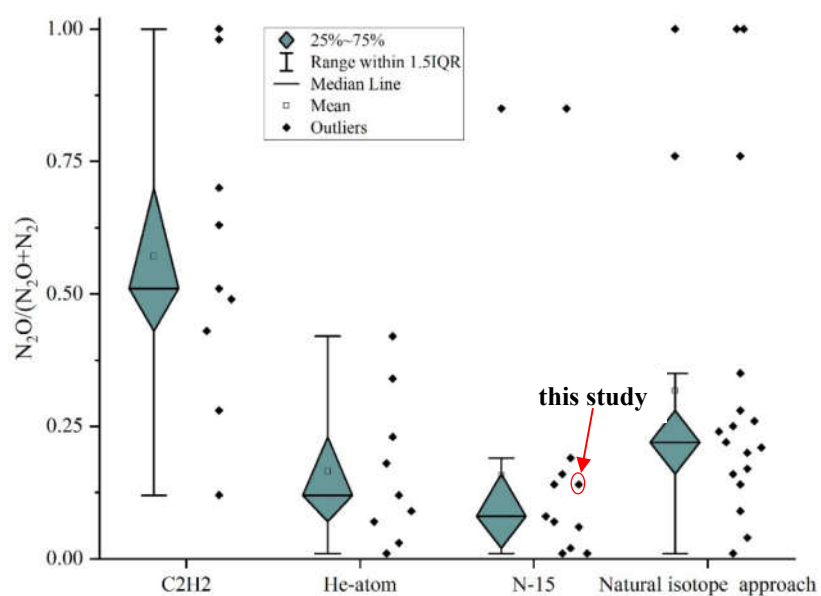

**Figure S4.** Comparison of  $N_2O/(N_2O+N_2)$  ratios obtained by different methods for forest soils.

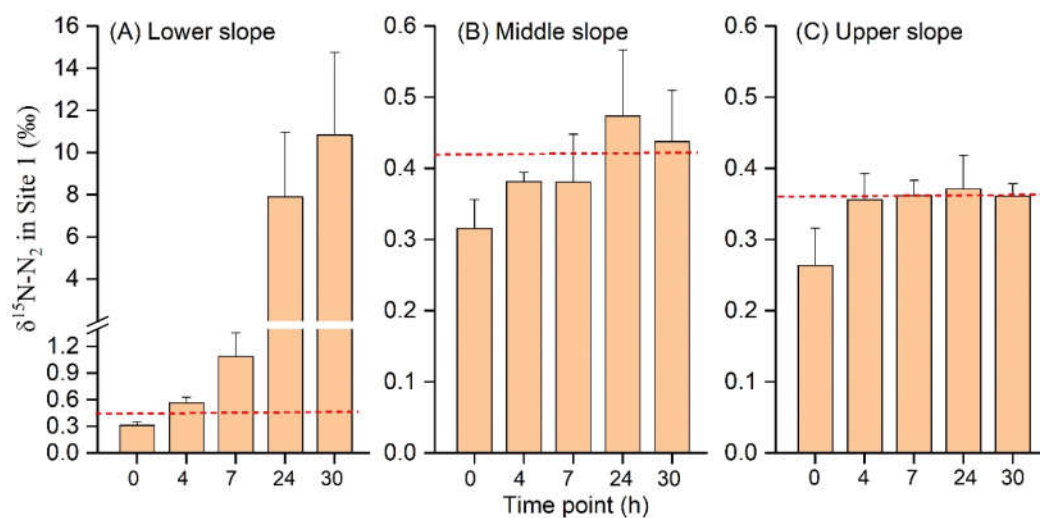

**Figure S5.** Changes of  $\delta^{15}\text{N-N}_2$  (‰) value with incubation time at the lower (A), middle (B), and upper (C) slope in site 1, respectively, after soil was labelled with  $^{15}\text{NO}_3^-$  addition ( $2.5 \text{ g } ^{15}\text{N m}^{-2}$ ) in the mixed forest of Qingyuan station in Northeast China. The red dotted line indicates the minimum detectable change for  $\delta^{15}\text{N}$  (0.11‰) and the error bars represent standard errors.

**Table S1.** Recompilation of the values of  $\text{N}_2\text{O}/(\text{N}_2 + \text{N}_2\text{O})$  ratio in natural forest soils.

| Location                         | Forest type               | Methods                | $\text{N}_2\text{O}/(\text{N}_2 + \text{N}_2\text{O})$ | Notes       | References |
|----------------------------------|---------------------------|------------------------|--------------------------------------------------------|-------------|------------|
| Kiel, Germany (Temperate)        | Beech forest              | $\text{C}_2\text{H}_2$ | 1.00                                                   | Field study | 16, 24     |
|                                  | Alder forest              | $\text{C}_2\text{H}_2$ | 0.70                                                   | Field study |            |
| Tuttlingen, Germany (Temperate)  | Beech forest              | He-atm                 | 0.23                                                   | Lab study   |            |
|                                  |                           | He-atm                 | 0.03                                                   | Lab study   |            |
| Munich, Germany (Temperate)      | Beech forest              | He-atm                 | 0.12                                                   | Lab study   |            |
|                                  | Spruce forest             | He-atm                 | 0.34                                                   | Lab study   |            |
| Mississippi, America (Temperate) | Hardwood forest           | $\text{C}_2\text{H}_2$ | 0.28                                                   | Lab study   |            |
|                                  |                           | $\text{C}_2\text{H}_2$ | 0.12                                                   | Lab study   |            |
| Gottinger, Germany (Temperate)   | Beech forest              | N-15                   | 0.85                                                   | Lab study   |            |
| Solling, Germany (Temperate)     | Beech forest              | N-15                   | 0.19                                                   | Lab study   |            |
| Michigan, America (Temperate)    | Sugar maple forest        | $\text{C}_2\text{H}_2$ | 0.98                                                   | Lab study   |            |
|                                  | Silver maple forest       | $\text{C}_2\text{H}_2$ | 0.63                                                   | Lab study   |            |
| America (Temperate)              | Hardwood forest           | N-15                   | 0.16                                                   | Lab study   |            |
| Northeast China (Temperate)      | Pine forest               | $\text{C}_2\text{H}_2$ | 0.49                                                   | Field study |            |
| America (Temperate)              | Wetland forest            | N-15                   | 0.02                                                   | Lab study   | 7          |
| America (Temperate)              | Hardwood forest           | N-15                   | 0.008                                                  | Field study | 27         |
|                                  |                           | He-atm                 | 0.01                                                   | Lab study   |            |
| Puerto Rico (Tropical)           | Cloud forest              | N-15                   | 0.06                                                   | Lab study   | 8          |
| England (Temperate)              | Deciduous woodland forest | N-15                   | 0.07                                                   | Field study | 28         |
|                                  | Mixed woodland forest     | N-15                   | 0.01                                                   | Field study |            |
| America (Temperate)              | Hardwood forest           | He-atm                 | 0.18                                                   | Lab study   | 9          |
| Canada (Temperate)               | Hardwood forest           | He-atm                 | 0.09                                                   | Lab study   | 10         |
| America (Temperate)              | Hardwood forest           | He-atm                 | 0.42                                                   | Lab study   |            |
| America (Temperate)              | Hardwood forest           | He-atm                 | 0.07                                                   | Lab study   |            |

| Location                    | Forest type                  | Methods                             | N <sub>2</sub> O/(N <sub>2</sub> +N <sub>2</sub> O) | Notes                  | References |
|-----------------------------|------------------------------|-------------------------------------|-----------------------------------------------------|------------------------|------------|
| Southern China (Tropical)   | Primary forest               | C <sub>2</sub> H <sub>2</sub>       | 0.51                                                | Lab study              | 30         |
|                             |                              | N-15                                | 0.14                                                | Lab study              |            |
|                             | Second forest                | C <sub>2</sub> H <sub>2</sub>       | 0.43                                                | Lab study              |            |
|                             |                              | N-15                                | 0.08                                                | Lab study              |            |
| Southern China (Tropical)   | Primary broad-leaved forest1 | natural N and<br>O isotope approach | 0.09                                                |                        | 24, 52     |
|                             | Second broad-leaved forest   |                                     | 0.35                                                |                        |            |
|                             | Primary broad-leaved forest2 |                                     | 0.14                                                |                        |            |
| Northern China (Temperate)  | coniferous forest (old-aged) |                                     | 0.01                                                |                        |            |
|                             | coniferous broad-leaved      |                                     | 0.04                                                |                        |            |
| America (Tropical)          | Tropical rain forests1       | Natural isotope approach            | 0.76                                                | Precipitation gradient | 53         |
|                             | Tropical rain forests2       |                                     | 0.28                                                |                        |            |
|                             | Tropical rain forests3       |                                     | 0.25                                                |                        |            |
|                             | Tropical rain forests4       |                                     | 0.20                                                |                        |            |
|                             | Tropical rain forests5       |                                     | 0.16                                                |                        |            |
|                             | Tropical rain forests6       |                                     | 0.17                                                |                        |            |
|                             | Tropical rain forests1       |                                     | 1.00                                                | Chronosequence         |            |
|                             | Tropical rain forests2       |                                     | 1.00                                                |                        |            |
|                             | Tropical rain forests3       |                                     | 0.22                                                |                        |            |
|                             | Tropical rain forests4       |                                     | 0.26                                                |                        |            |
|                             | Tropical rain forests5       |                                     | 0.24                                                |                        |            |
|                             | Tropical rain forests6       |                                     | 0.21                                                |                        |            |
| Northeast China (Temperate) | Broad-leaved forest          | N-15                                | 0.16 <sup>a</sup>                                   | Field study            | This study |
|                             |                              |                                     | 0.15 <sup>b</sup>                                   |                        |            |
| Mean                        |                              |                                     | 0.30                                                |                        |            |

Note: The references can be seen in the main text. <sup>a</sup> indicates ratio of N<sub>2</sub>O<sub>denitrification</sub> to N<sub>2</sub>O<sub>denitrification</sub> plus N<sub>2denitrification</sub>; <sup>b</sup> indicates ratio of bulk N<sub>2</sub>O to bulk N<sub>2</sub>O plus total N<sub>2</sub>.



**Table S2.** Pearson correlations between soil properties in the mixed forest of Qingyuan station in Northeast China.

|                                                                  | Bulk density | pH    | WFPS   | TOC     | TN      | C/N ratio | NH <sub>4</sub> <sup>+</sup> | NO <sub>3</sub> <sup>-</sup> | NH <sub>4</sub> <sup>+</sup> /NO <sub>3</sub> <sup>-</sup> ratio |
|------------------------------------------------------------------|--------------|-------|--------|---------|---------|-----------|------------------------------|------------------------------|------------------------------------------------------------------|
| Bulk density                                                     | 1.00         | 0.01  | -0.07  | -0.42** | -0.39** | -0.30*    | -0.32*                       | 0.22                         | -0.25                                                            |
| pH                                                               | 0.01         | 1.00  | -0.15  | -0.13   | -0.09   | -0.23     | 0.22                         | -0.23                        | 0.31*                                                            |
| WFPS                                                             | -0.07        | -0.15 | 1.00   | 0.37*   | 0.25    | 0.60**    | 0.24                         | -0.09                        | 0.23                                                             |
| TOC                                                              | -0.42**      | -0.13 | 0.37** | 1.00    | 0.91**  | 0.62**    | 0.77**                       | -0.20                        | 0.51**                                                           |
| TN                                                               | -0.39**      | -0.09 | 0.25   | 0.91**  | 1.00    | 0.37*     | 0.77**                       | -0.30*                       | 0.54**                                                           |
| C/N ratio                                                        | -0.30*       | -0.23 | 0.60** | 0.62**  | 0.37*   | 1.00      | 0.31*                        | 0.11                         | 0.18                                                             |
| NH <sub>4</sub> <sup>+</sup>                                     | -0.32*       | 0.22  | 0.24   | 0.77**  | 0.77**  | 0.31*     | 1.00                         | -0.19                        | 0.58**                                                           |
| NO <sub>3</sub> <sup>-</sup>                                     | 0.22         | -0.23 | -0.09  | -0.20   | -0.30*  | 0.11      | -0.19                        | 1.00                         | -0.75**                                                          |
| NH <sub>4</sub> <sup>+</sup> /NO <sub>3</sub> <sup>-</sup> ratio | -0.25        | 0.31* | 0.23   | 0.51**  | 0.54**  | 0.18      | 0.58**                       | -0.75**                      | 1.00                                                             |

\* and \*\* represent correlation significance at  $p < 0.05$  and  $p < 0.01$ , respectively.
