# Supplementary material for: Spatial Variations of Soil N2 and N2O Emissions from a Temperate Forest: Quantified by the In Situ 15N Labeling Method
Source: MDPI journal article supplement (doi:10.3390/f13091347), 2022-08-24
Supplement: s1 [file s1]

Archive with 1 entries (1 files):
- forests-1834649-supplementary.pdf
